# Supplementary material
Source: PubMed Central journal article supplement (PMC5039379)
Supplement: jcav07p1587s1.pdf [file jcav07p1587s1.pdf]

**Supplementary tables**

Table S1. Associations among the rates of incidence by race with age, stage, grade, ER status, PR status and marital status in the population of 413,437 patients analyzed

|                | Race groups  |           |                  |                 |        |                            |                    |
|----------------|--------------|-----------|------------------|-----------------|--------|----------------------------|--------------------|
|                | All Patients | Caucasian | African American | Native American | Asian  | Hawaiian/ Pacific Islander |                    |
| All Patients   | 413,437      | 341,210   | 38,462           | 1,937           | 27,656 | 4,172                      |                    |
| Age            |              |           |                  |                 |        |                            |                    |
| 20             | 539          | 354       | 119              | 3               | 53     | 10                         | p = 0 (Chi square) |
| 30             | 8,851        | 6,483     | 1,382            | 54              | 813    | 119                        |                    |
| 40             | 59,448       | 45,745    | 7,141            | 376             | 5,253  | 933                        |                    |
| 50             | 92,983       | 74,360    | 9,727            | 516             | 7,192  | 1,188                      |                    |
| 60             | 111,960      | 92,657    | 10,163           | 553             | 7,486  | 1,101                      |                    |
| 70             | 72,464       | 62,055    | 5,519            | 287             | 4,094  | 509                        |                    |
| 80             | 56,126       | 49,610    | 3,690            | 123             | 2,432  | 271                        |                    |
| 90+            | 11,066       | 9,946     | 721              | 25              | 333    | 41                         |                    |
| Stage          |              |           |                  |                 |        |                            |                    |
| I              | 205,540      | 174,851   | 14,570           | 834             | 13,315 | 1,970                      | p = 0 (Chi Square) |
| II             | 151,959      | 122,530   | 16,475           | 777             | 10,490 | 1,687                      |                    |
| III            | 55,938       | 43,829    | 7,417            | 326             | 3,851  | 515                        |                    |
| Grade          |              |           |                  |                 |        |                            |                    |
| 1              | 77,777       | 67,926    | 4,272            | 325             | 4,544  | 710                        | p = 0 (Chi Square) |
| 2              | 177,756      | 149,476   | 13,492           | 792             | 12,125 | 1,871                      |                    |
| 3              | 157,904      | 123,808   | 20,698           | 820             | 10,987 | 1,591                      |                    |
| ER Status      |              |           |                  |                 |        |                            |                    |
| +              | 323,937      | 272,897   | 24,422           | 1,471           | 21,794 | 3,353                      | p = 0 (Chi Square) |
| -              | 89,500       | 68,313    | 14,040           | 466             | 5,862  | 819                        |                    |
| PR Status      |              |           |                  |                 |        |                            |                    |
| +              | 281,703      | 237,739   | 20,501           | 1,314           | 19,234 | 2,915                      | p = 0 (Chi Square) |
| -              | 131,734      | 103,471   | 17,961           | 623             | 8,422  | 1,257                      |                    |
| Marital Status |              |           |                  |                 |        |                            |                    |
| Single         | 53,491       | 38,657    | 10,605           | 336             | 3,373  | 520                        | p = 0 (Chi Square) |
| Married        | 247,073      | 208,943   | 15,131           | 1,054           | 19,005 | 2,940                      |                    |
| Separated      | 3,868        | 2,699     | 868              | 32              | 232    | 37                         |                    |
| Divorced       | 44,232       | 36,026    | 5,843            | 274             | 1,833  | 256                        |                    |
| Widowed        | 64,773       | 54,885    | 6,015            | 241             | 3,213  | 419                        |                    |

Table S2. Associations among rates of incidence by age with stage, grade, ER status, PR status and marital status in the 413,437 patients analyzed

|                | Age groups (years) |     |       |        |        |         |        |        |        |                    |
|----------------|--------------------|-----|-------|--------|--------|---------|--------|--------|--------|--------------------|
|                | All Patients       | 20  | 30    | 40     | 50     | 60      | 70     | 80     | 90+    |                    |
| All Patients   | 413,437            | 539 | 8,851 | 59,448 | 92,983 | 111,960 | 72,464 | 56,126 | 11,066 |                    |
| Stage          |                    |     |       |        |        |         |        |        |        |                    |
| I              | 205,540            | 148 | 2,405 | 22,516 | 42,543 | 59,118  | 42,151 | 31,645 | 5,014  | p = 0 (Chi Square) |
| II             | 151,959            | 276 | 4,334 | 26,128 | 36,603 | 39,018  | 22,839 | 18,359 | 4,402  |                    |
| III            | 55,938             | 115 | 2,112 | 10,804 | 13,837 | 13,824  | 7,474  | 6,122  | 1,650  |                    |
| Grade          |                    |     |       |        |        |         |        |        |        |                    |
| 1              | 77,777             | 21  | 476   | 6,734  | 16,493 | 22,535  | 16,655 | 12,705 | 2,158  | p = 0 (Chi Square) |
| 2              | 177,756            | 172 | 2,646 | 22,918 | 38,035 | 48,670  | 33,388 | 26,740 | 5,187  |                    |
| 3              | 157,904            | 346 | 5,729 | 29,796 | 38,455 | 40,755  | 22,421 | 16,681 | 3,721  |                    |
| ER Status      |                    |     |       |        |        |         |        |        |        |                    |
| +              | 323,937            | 346 | 5,318 | 42,454 | 70,293 | 88,413  | 60,179 | 47,615 | 9,319  | p = 0 (Chi Square) |
| -              | 89,500             | 193 | 3,533 | 16,994 | 22,690 | 23,547  | 12,285 | 8,511  | 1,747  |                    |
| PR Status      |                    |     |       |        |        |         |        |        |        |                    |
| +              | 281,703            | 298 | 4,736 | 39,251 | 62,804 | 75,055  | 51,551 | 40,278 | 7,730  | p = 0 (Chi Square) |
| -              | 131,734            | 241 | 3,336 | 4,115  | 15,848 | 20,197  | 20,913 | 30,179 | 36,905 |                    |
| Marital Status |                    |     |       |        |        |         |        |        |        |                    |
| Single         | 53,491             | 373 | 2,771 | 11,479 | 14,780 | 13,358  | 5,997  | 3,892  | 841    | p = 0 (Chi Square) |
| Married        | 247,073            | 148 | 5,440 | 40,886 | 63,111 | 73,003  | 40,886 | 21,783 | 1,816  |                    |
| Separated      | 3,868              | 6   | 105   | 814    | 1,181  | 1,079   | 453    | 200    | 30     |                    |
| Divorced       | 44,232             | 12  | 495   | 5,689  | 11,458 | 14,912  | 7,567  | 3,676  | 423    |                    |
| Widowed        | 64,773             | 0   | 40    | 580    | 2,453  | 9,608   | 17,561 | 26,575 | 7,956  |                    |

Table S3. Associations among rates of incidence by stage with grade, ER status, PR status and marital status in the 413,437 patients analyzed

|                | Stage        |         |         |        |                    |
|----------------|--------------|---------|---------|--------|--------------------|
|                | All Patients | I       | II      | III    |                    |
| All Patients   | 413,437      | 205,540 | 151,959 | 55,938 |                    |
| Grade          |              |         |         |        |                    |
| 1              | 77,777       | 57,144  | 17,646  | 2,987  | p = 0 (Chi Square) |
| 2              | 177,756      | 95,307  | 62,379  | 20,070 |                    |
| 3              | 157,904      | 53,089  | 71,934  | 32,881 |                    |
| ER Status      |              |         |         |        |                    |
| +              | 323,937      | 172,402 | 112,648 | 38,887 | p = 0 (Chi Square) |
| -              | 89,500       | 33,138  | 39,311  | 17,051 |                    |
| PR Status      |              |         |         |        |                    |
| +              | 281,703      | 151,259 | 97,644  | 32,800 | p = 0 (Chi Square) |
| -              | 131,734      | 54,281  | 54,315  | 23,138 |                    |
| Marital Status |              |         |         |        |                    |
| Single         | 53,491       | 23,191  | 21,531  | 8,769  | p = 0 (Chi Square) |
| Married        | 247,073      | 125,800 | 89,630  | 31,643 |                    |
| Separated      | 3,868        | 1,576   | 1,563   | 729    |                    |
| Divorced       | 44,232       | 21,146  | 16,659  | 6,427  |                    |
| Widowed        | 64,773       | 33,827  | 22,576  | 8,370  |                    |

Table S4. Associations among rates of incidence by grade with ER status, PR status and marital status in the 413,437 patients analyzed

|                | Grade        |        |         |         |                                     |
|----------------|--------------|--------|---------|---------|-------------------------------------|
|                | All Patients | 1      | 2       | 3       |                                     |
| All Patients   | 413,437      | 77,777 | 177,756 | 157,904 |                                     |
| ER Status      |              |        |         |         |                                     |
| +              | 323,937      | 75,282 | 159,685 | 88,970  | p = 0 (Chi Square)                  |
| -              | 89,500       | 2,495  | 18,071  | 68,934  |                                     |
| PR Status      |              |        |         |         |                                     |
| +              | 281,703      | 67,457 | 140,347 | 73,899  | p = 0 (Chi Square)                  |
| -              | 131,734      | 10,320 | 37,409  | 84,005  |                                     |
| Marital Status |              |        |         |         |                                     |
| Single         | 53,491       | 8,857  | 22,120  | 22,514  | p < 10 <sup>-150</sup> (Chi Square) |
| Married        | 247,073      | 46,714 | 105,640 | 94,719  |                                     |
| Separated      | 3,868        | 618    | 1,517   | 1,733   |                                     |
| Divorced       | 44,232       | 8,242  | 18,496  | 17,494  |                                     |
| Widowed        | 64,773       | 13,346 | 29,983  | 21,444  |                                     |

Table S5. Associations among rates of incidence by ER and PR status with marital status at presentation in the 413,437 patients analyzed

| Hormone Status | All Patients | Single | Married | Separated | Divorced                            | Widowed |
|----------------|--------------|--------|---------|-----------|-------------------------------------|---------|
| All Patients   | 413,437      | 53,491 | 247,073 | 3,868     | 44,232                              | 64,773  |
| ER+            | 323,937      | 40,926 | 193,031 | 2,814     | 33,897                              | 53,269  |
| ER-            | 89,500       | 12,565 | 54,042  | 1,054     | 10,335                              | 11,504  |
|                |              |        |         |           | p < 10 <sup>-150</sup> (Chi Square) |         |
| PR+            | 281,703      | 35,621 | 169,145 | 2,430     | 29,384                              | 45,123  |
| PR-            | 131,734      | 17,870 | 77,928  | 1,438     | 14,848                              | 19,650  |
|                |              |        |         |           | p < 10 <sup>-50</sup> (Chi Square)  |         |

Table S6. Associations among rates of incidence by ER status with PR status at presentation in the 413,437 patients analyzed

| Hormone Status | All Patients | PR+                | PR-     |
|----------------|--------------|--------------------|---------|
| All Patients   | 413,437      | 281,703            | 131,734 |
| ER+            | 323,937      | 274,288            | 49,649  |
| ER-            | 89,500       | 7,415              | 82,085  |
|                |              | p = 0 (Chi Square) |         |

Table S7. Number of patients in cells stratified by **three variables: age**, (10 yr. increments), **stage**, and **ER status**, or **age, stage and PR status**.

| <b>Age</b> | <b>Stage</b> | Number of patients<br>(Caucasian<br>/African<br>American) | African<br>Americans/<br>Caucasians<br>(Ratio to<br>population) |
|------------|--------------|-----------------------------------------------------------|-----------------------------------------------------------------|-----------------------------------------------------------|-----------------------------------------------------------------|-----------------------------------------------------------|-----------------------------------------------------------------|-----------------------------------------------------------|-----------------------------------------------------------------|
|            |              | <b>ER+</b>                                                |                                                                 | <b>ER-</b>                                                |                                                                 | <b>PR+</b>                                                |                                                                 | <b>PR-</b>                                                |                                                                 |
|            | All patients |                                                           | 0.089 (0.79)                                                    |                                                           | 0.206 ( <b>1.82</b> )                                           |                                                           | 0.086 (0.76)                                                    |                                                           | 0.174 ( <b>1.54</b> )                                           |
| <b>40</b>  | <b>I</b>     | 14055/1367                                                | 0.097 (0.86)                                                    | 3909/ 656                                                 | 0.168 ( <b>1.49</b> )                                           | 13262 1223                                                | 0.092 (0.81)                                                    | 4702/ 800                                                 | 0.170 ( <b>1.50</b> )                                           |
| <b>50</b>  | <b>I</b>     | 28981/2294                                                | 0.079 (0.70)                                                    | 6096/1142                                                 | 0.187 ( <b>1.65</b> )                                           | 26321/2016                                                | 0.077 (0.68)                                                    | 8756/1420                                                 | 0.162 ( <b>1.43</b> )                                           |
| <b>60</b>  | <b>I</b>     | 42533/3041                                                | 0.071 (0.63)                                                    | 7594/1293                                                 | 0.170 ( <b>1.50</b> )                                           | 36736/2512                                                | 0.068 (0.60)                                                    | 13391/1822                                                | 0.136 ( <b>1.20</b> )                                           |
| <b>70</b>  | <b>I</b>     | 32167/1982                                                | 0.062 (0.49)                                                    | 4577/ 629                                                 | 0.137 ( <b>1.21</b> )                                           | 27831/1660                                                | 0.060 (0.53)                                                    | 8913/ 951                                                 | 0.107 (0.95)                                                    |
| <b>80</b>  | <b>I</b>     | 25305/1291                                                | 0.051 (0.45)                                                    | 3136/ 329                                                 | 0.105 (0.93)                                                    | 21638/1065                                                | 0.049 (0.43)                                                    | 6803/ 555                                                 | 0.082 (0.73)                                                    |
| <b>40</b>  | <b>II</b>    | 13706/1875                                                | 0.137 ( <b>1.21</b> )                                           | 6052/1583                                                 | 0.262 ( <b>2.32</b> )                                           | 12637/1652                                                | 0.131 ( <b>1.16</b> )                                           | 7121/1806                                                 | 0.254 ( <b>2.25</b> )                                           |
| <b>50</b>  | <b>II</b>    | 21218/2391                                                | 0.113 (1.00)                                                    | 7449/1961                                                 | 0.263 ( <b>2.33</b> )                                           | 18939/2046                                                | 0.108 (0.96)                                                    | 9728/2306                                                 | 0.237 ( <b>2.10</b> )                                           |
| <b>60</b>  | <b>II</b>    | 24346/2428                                                | 0.100 (0.85)                                                    | 7286/1636                                                 | 0.225 ( <b>1.99</b> )                                           | 20610/1974                                                | 0.096 (0.85)                                                    | 11022/2090                                                | 0.190 ( <b>1.68</b> )                                           |
| <b>70</b>  | <b>II</b>    | 15481/1409                                                | 0.091 (0.81)                                                    | 3747/ 662                                                 | 0.177 ( <b>1.57</b> )                                           | 13150/1166                                                | 0.089 (0.79)                                                    | 6078/ 905                                                 | 0.149 ( <b>1.32</b> )                                           |
| <b>80</b>  | <b>II</b>    | 13217/1057                                                | 0.080 (0.71)                                                    | 2744/ 406                                                 | 0.148 ( <b>1.31</b> )                                           | 11097/ 883                                                | 0.080 (0.71)                                                    | 4864/ 580                                                 | 0.119 ( <b>1.05</b> )                                           |
| <b>40</b>  | <b>III</b>   | 5501/ 897                                                 | 0.164 ( <b>1.45</b> )                                           | 2522/ 763                                                 | 0.303 ( <b>2.68</b> )                                           | 4973/ 772                                                 | 0.155 ( <b>1.37</b> )                                           | 3050/ 888                                                 | 0.291 ( <b>2.58</b> )                                           |
| <b>50</b>  | <b>III</b>   | 7444/1068                                                 | 0.143 ( <b>1.27</b> )                                           | 3172/ 871                                                 | 0.275 ( <b>2.43</b> )                                           | 6427/ 871                                                 | 0.136 ( <b>1.20</b> )                                           | 4189/1068                                                 | 0.255 ( <b>2.26</b> )                                           |
| <b>60</b>  | <b>III</b>   | 7835/1021                                                 | 0.130 ( <b>1.15</b> )                                           | 3063/ 744                                                 | 0.243 ( <b>2.15</b> )                                           | 6358/ 794                                                 | 0.125 ( <b>1.11</b> )                                           | 4540/ 971                                                 | 0.214 ( <b>1.89</b> )                                           |
| <b>70</b>  | <b>III</b>   | 4534/ 547                                                 | 0.121 ( <b>1.07</b> )                                           | 1549/ 290                                                 | 0.187 ( <b>1.65</b> )                                           | 3804/ 439                                                 | 0.115 ( <b>1.02</b> )                                           | 2279/ 398                                                 | 0.175 ( <b>1.55</b> )                                           |
| <b>80</b>  | <b>III</b>   | 3981/ 392                                                 | 0.098 (0.87)                                                    | 1227/ 215                                                 | 0.175 ( <b>1.55</b> )                                           | 3259/ 287                                                 | 0.088 (0.79)                                                    | 1949/ 320                                                 | 0.164 ( <b>1.45</b> )                                           |

Table S8. Number of patients in cells stratified by **four variables: age**, (10 yr. increments), **stage, grade** and **ER status**, or **age, stage, grade** and **PR status**.

| Age            | Stage        | Number of patients<br>(Caucasian<br>/African<br>American) | African<br>Americans/<br>Caucasians<br>(Ratio to<br>population) |
|----------------|--------------|-----------------------------------------------------------|-----------------------------------------------------------------|-----------------------------------------------------------|-----------------------------------------------------------------|-----------------------------------------------------------|-----------------------------------------------------------------|-----------------------------------------------------------|-----------------------------------------------------------------|
|                |              | <b>ER+</b>                                                |                                                                 | <b>ER-</b>                                                |                                                                 | <b>PR+</b>                                                |                                                                 | <b>PR-</b>                                                |                                                                 |
|                | All patients |                                                           | 0.089 (0.79)                                                    |                                                           | 0.206 (1.82)                                                    |                                                           | 0.086 (0.76)                                                    |                                                           | 0.174 (1.54)                                                    |
| <b>Grade 1</b> |              |                                                           |                                                                 |                                                           |                                                                 |                                                           |                                                                 |                                                           |                                                                 |
| 40             | I            | 3559/ 259                                                 | 0.073 (0.65)                                                    | 146/ 16                                                   | 0.110 (0.97)                                                    | 3421/ 238                                                 | 0.070 (0.62)                                                    | 284/ 37                                                   | 0.130 (1.15)                                                    |
| 50             | I            | 9509/ 548                                                 | 0.058 (0.51)                                                    | 326/ 39                                                   | 0.120 (1.06)                                                    | 8813/ 497                                                 | 0.056 (0.50)                                                    | 1022/ 90                                                  | 0.088 (0.78)                                                    |
| 60             | I            | 14388/ 784                                                | 0.054 (0.48)                                                    | 400/ 44                                                   | 0.110 (0.97)                                                    | 12676/ 662                                                | 0.052 (0.46)                                                    | 2112/ 166                                                 | 0.079 (0.70)                                                    |
| 70             | I            | 11201/ 559                                                | 0.050 (0.44)                                                    | 293/ 33                                                   | 0.113 (1.00)                                                    | 9867/ 480                                                 | 0.049 (0.43)                                                    | 1627/ 112                                                 | 0.069 (0.61)                                                    |
| 80             | I            | 8676/ 376                                                 | 0.043 (0.38)                                                    | 220/ 16                                                   | 0.073 (0.65)                                                    | 7560/ 305                                                 | 0.040 (0.35)                                                    | 1336/ 87                                                  | 0.065 (0.57)                                                    |
| 40             | II           | 1430/ 168                                                 | 0.117 (1.04)                                                    | 68/ 9                                                     | 0.132 (1.17)                                                    | 1378/ 161                                                 | 0.117 (1.04)                                                    | 120/ 16                                                   | 0.133 (1.18)                                                    |
| 50             | II           | 3485/ 292                                                 | 0.084 (0.74)                                                    | 112/ 18                                                   | 0.161 (1.42)                                                    | 3257/ 265                                                 | 0.081 (0.72)                                                    | 340/ 45                                                   | 0.132 (1.17)                                                    |
| 60             | II           | 4170/ 306                                                 | 0.073 (0.65)                                                    | 134/ 11                                                   | 0.082 (0.73)                                                    | 3697/ 255                                                 | 0.069 (0.61)                                                    | 607/ 62                                                   | 0.102 (0.90)                                                    |
| 70             | II           | 2775/ 187                                                 | 0.067 (0.59)                                                    | 87/ 12                                                    | 0.138 (1.22)                                                    | 2482/ 161                                                 | 0.065 (0.58)                                                    | 380/ 38                                                   | 0.100 (0.88)                                                    |
| 80             | II           | 2162/ 147                                                 | 0.068 (0.60)                                                    | 64/ 4                                                     | 0.063 (0.56)                                                    | 1908/ 127                                                 | 0.067 (0.59)                                                    | 318/ 24                                                   | 0.075 (0.66)                                                    |
| 40             | III          | 284/ 42                                                   | 0.148 (1.31)                                                    | 18/ 3                                                     | 0.167 (1.48)                                                    | 267/ 40                                                   | 0.150 (1.33)                                                    | 35/ 5                                                     | 0.143 (1.27)                                                    |
| 50             | III          | 608/ 73                                                   | 0.120 (1.06)                                                    | 30/ 10                                                    | 0.333 (2.95)                                                    | 563/ 65                                                   | 0.115 (1.02)                                                    | 75/ 18                                                    | 0.240 (2.12)                                                    |
| 60             | III          | 623/ 64                                                   | 0.103 (0.91)                                                    | 42/ 4                                                     | 0.095 (0.84)                                                    | 549/ 52                                                   | 0.095 (0.84)                                                    | 116/ 16                                                   | 0.138 (1.22)                                                    |
| 70             | III          | 379/ 33                                                   | 0.087 (0.77)                                                    | 16/ 3                                                     | 0.188 (1.66)                                                    | 333/ 29                                                   | 0.087 (0.77)                                                    | 62/ 7                                                     | 0.113 (1.00)                                                    |
| 80             | III          | 355/ 31                                                   | 0.087 (0.77)                                                    | 24/ 2                                                     | 0.083 (0.73)                                                    | 294/ 28                                                   | 0.095 (0.84)                                                    | 85/ 5                                                     | 0.059 (0.52)                                                    |
| <b>Grade 2</b> |              |                                                           |                                                                 |                                                           |                                                                 |                                                           |                                                                 |                                                           |                                                                 |
| 40             | I            | 7120/ 644                                                 | 0.090 (0.80)                                                    | 820/ 115                                                  | 0.140 (1.24)                                                    | 6733/ 592                                                 | 0.088 (0.78)                                                    | 1207/ 167                                                 | 0.138 (1.22)                                                    |
| 50             | I            | 14161/1078                                                | 0.076 (0.67)                                                    | 1503/ 242                                                 | 0.161 (1.42)                                                    | 12952/ 959                                                | 0.074 (0.65)                                                    | 2712/ 361                                                 | 0.133 (1.18)                                                    |
| 60             | I            | 21043/1529                                                | 0.073 (0.65)                                                    | 2104/ 333                                                 | 0.158 (1.40)                                                    | 18277/1278                                                | 0.070 (0.62)                                                    | 4870/ 584                                                 | 0.120 (1.06)                                                    |
| 70             | I            | 16134/1019                                                | 0.063 (0.56)                                                    | 1476/ 180                                                 | 0.122 (1.08)                                                    | 14023/ 851                                                | 0.061 (0.54)                                                    | 3587/ 348                                                 | 0.097 (0.86)                                                    |
| 80             | I            | 12821/ 683                                                | 0.053 (0.47)                                                    | 1113/ 111                                                 | 0.100 (0.88)                                                    | 10973/ 570                                                | 0.052 (0.46)                                                    | 2961/ 224                                                 | 0.076 (0.67)                                                    |
| 40             | II           | 6588/ 773                                                 | 0.117 (1.04)                                                    | 806/ 183                                                  | 0.227 (2.00)                                                    | 6175/ 687                                                 | 0.111 (0.98)                                                    | 1219/ 269                                                 | 0.221 (1.96)                                                    |
| 50             | II           | 10462/1010                                                | 0.097 (0.86)                                                    | 1167/ 223                                                 | 0.191 (1.69)                                                    | 9547/ 887                                                 | 0.093 (0.82)                                                    | 2082/ 346                                                 | 0.166 (1.47)                                                    |
| 60             | II           | 12323/1121                                                | 0.091 (0.81)                                                    | 1238/ 253                                                 | 0.204 (1.81)                                                    | 10630/ 925                                                | 0.087 (0.77)                                                    | 2931/ 449                                                 | 0.153 (1.35)                                                    |
| 70             | II           | 8043/ 661                                                 | 0.082 (0.73)                                                    | 708/ 106                                                  | 0.150 (1.33)                                                    | 6921/ 551                                                 | 0.080 (0.71)                                                    | 1830/ 216                                                 | 0.118 (1.04)                                                    |
| 80             | II           | 7086/ 510                                                 | 0.072 (0.64)                                                    | 624/ 97                                                   | 0.155 (1.37)                                                    | 6086/ 445                                                 | 0.073 (0.65)                                                    | 1624/ 162                                                 | 0.100 (0.88)                                                    |
| 40             | III          | 2356/ 335                                                 | 0.142 (1.26)                                                    | 383/ 103                                                  | 0.269 (2.38)                                                    | 2161/ 282                                                 | 0.130 (1.15)                                                    | 578/ 156                                                  | 0.270 (2.39)                                                    |
| 50             | III          | 3392/ 427                                                 | 0.126 (1.12)                                                    | 509/ 87                                                   | 0.179 (1.58)                                                    | 3010/ 353                                                 | 0.117 (1.04)                                                    | 891/ 161                                                  | 0.181 (1.60)                                                    |
| 60             | III          | 3669/ 409                                                 | 0.111 (0.98)                                                    | 479/ 109                                                  | 0.228 (2.02)                                                    | 3041/ 320                                                 | 0.105 (0.93)                                                    | 1107/ 198                                                 | 0.179 (1.58)                                                    |
| 70             | III          | 2169/ 224                                                 | 0.103 (0.91)                                                    | 294/ 47                                                   | 0.160 (1.42)                                                    | 1864/ 182                                                 | 0.098 (0.87)                                                    | 599/ 89                                                   | 0.149 (1.32)                                                    |
| 80             | III          | 1873/ 168                                                 | 0.090 (0.80)                                                    | 226/ 41                                                   | 0.181 (1.60)                                                    | 1570/ 118                                                 | 0.075 (0.66)                                                    | 529/ 91                                                   | 0.172 (1.52)                                                    |
| <b>Grade 3</b> |              |                                                           |                                                                 |                                                           |                                                                 |                                                           |                                                                 |                                                           |                                                                 |
| 40             | I            | 3376/ 464                                                 | 0.137 (1.21)                                                    | 2943/ 525                                                 | 0.178 (1.58)                                                    | 3108/ 393                                                 | 0.126 (1.12)                                                    | 3211/ 596                                                 | 0.186 (1.65)                                                    |
| 50             | I            | 5311/ 668                                                 | 0.126 (1.12)                                                    | 4267 861                                                  | 0.202 (1.79)                                                    | 4556/ 560                                                 | 0.123 (1.09)                                                    | 5022/ 969                                                 | 0.193 (1.71)                                                    |
| 60             | I            | 7102/ 728                                                 | 0.103 (0.91)                                                    | 5090/ 916                                                 | 0.180 (1.59)                                                    | 5783/ 572                                                 | 0.099 (0.88)                                                    | 6409/1072                                                 | 0.167 (1.48)                                                    |
| 70             | I            | 4832/ 404                                                 | 0.084 (0.74)                                                    | 2808/ 416                                                 | 0.148 (1.31)                                                    | 3941/ 329                                                 | 0.083 (0.73)                                                    | 3699/ 491                                                 | 0.133 (1.18)                                                    |
| 80             | I            | 3808/ 232                                                 | 0.061 (0.54)                                                    | 1803/ 202                                                 | 0.112 (0.99)                                                    | 3105/ 190                                                 | 0.061 (0.54)                                                    | 2506/ 244                                                 | 0.097 (0.86)                                                    |
| 40             | II           | 5688/ 934                                                 | 0.164 (1.45)                                                    | 5178/1391                                                 | 0.269 (2.38)                                                    | 5084/ 804                                                 | 0.158 (1.40)                                                    | 5782/1521                                                 | 0.263 (2.33)                                                    |
| 50             | II           | 7271/1089                                                 | 0.150 (1.33)                                                    | 6170/1720                                                 | 0.279 (2.47)                                                    | 6135/ 894                                                 | 0.146 (1.29)                                                    | 7306/1915                                                 | 0.262 (2.32)                                                    |
| 60             | II           | 7853/1001                                                 | 0.127 (1.12)                                                    | 5914/1372                                                 | 0.232 (2.05)                                                    | 6283/ 794                                                 | 0.126 (1.12)                                                    | 7484/1579                                                 | 0.211 (1.87)                                                    |
| 70             | II           | 4663/ 561                                                 | 0.120 (1.06)                                                    | 2952/ 544                                                 | 0.184 (1.63)                                                    | 3747/ 454                                                 | 0.121 (1.07)                                                    | 3868/ 651                                                 | 0.168 (1.49)                                                    |
| 80             | II           | 3969/ 400                                                 | 0.101 (0.89)                                                    | 2056/ 305                                                 | 0.148 (1.31)                                                    | 3103/ 311                                                 | 0.100 (0.88)                                                    | 2922/ 394                                                 | 0.135 (1.19)                                                    |
| 40             | III          | 2861/ 520                                                 | 0.182 (1.61)                                                    | 2121/ 657                                                 | 0.310 (2.74)                                                    | 2545/ 450                                                 | 0.177 (1.57)                                                    | 2437/ 727                                                 | 0.298 (2.64)                                                    |
| 50             | III          | 3444/ 568                                                 | 0.165 (1.46)                                                    | 2633/ 774                                                 | 0.294 (2.60)                                                    | 2854/ 453                                                 | 0.159 (1.41)                                                    | 3223/ 889                                                 | 0.276 (2.44)                                                    |
| 60             | III          | 3543/ 548                                                 | 0.155 (1.37)                                                    | 2542/ 631                                                 | 0.248 (2.19)                                                    | 2768/ 422                                                 | 0.152 (1.35)                                                    | 3317/ 757                                                 | 0.228 (2.02)                                                    |
| 70             | III          | 1986/ 290                                                 | 0.146 (1.29)                                                    | 1239/ 240                                                 | 0.194 (1.72)                                                    | 1607/ 228                                                 | 0.142 (1.26)                                                    | 1618/ 302                                                 | 0.187 (1.65)                                                    |
| 80             | III          | 1753/ 193                                                 | 0.110 (0.97)                                                    | 977/ 172                                                  | 0.176 (1.56)                                                    | 1395/ 141                                                 | 0.101 (0.89)                                                    | 1335/ 224                                                 | 0.168 (1.49)                                                    |

Table S9a. Number of patients in cells stratified by **four variables: age**, (10 yr. increments), **stage**, **marital status (single, married or separated)** and **ER status**, or **age, stage, marital status (single, married or separated)** and **PR status**.

| <b>Age</b>     | <b>Stage</b> | Number of patients<br>(Caucasian /African American) | Frequency of African Americans compared to Caucasians | Number of patients<br>(Caucasian /African American) | Frequency of African Americans compared to Caucasians | Number of patients<br>(Caucasian /African American) | Frequency of African Americans compared to Caucasians | Number of patients<br>(Caucasian /African American) | Frequency of African Americans compared to Caucasians |
|----------------|--------------|-----------------------------------------------------|-------------------------------------------------------|-----------------------------------------------------|-------------------------------------------------------|-----------------------------------------------------|-------------------------------------------------------|-----------------------------------------------------|-------------------------------------------------------|
|                |              | <b>ER+</b>                                          |                                                       | <b>ER-</b>                                          |                                                       | <b>PR+</b>                                          |                                                       | <b>PR-</b>                                          |                                                       |
|                | All patients |                                                     | 0.089 (0.79)                                          |                                                     | 0.206 (1.82)                                          |                                                     | 0.086 (0.76)                                          |                                                     | 0.174 (1.54)                                          |
| <b>Single</b>  |              |                                                     |                                                       |                                                     |                                                       |                                                     |                                                       |                                                     |                                                       |
| <b>40</b>      | <b>I</b>     | 2388/ 514                                           | 0.215 (1.90)                                          | 519/ 231                                            | 0.445 (3.94)                                          | 2252/ 458                                           | 0.203 (1.80)                                          | 655/ 287                                            | 0.438 (3.88)                                          |
| <b>50</b>      | <b>I</b>     | 3897/ 711                                           | 0.182 (1.61)                                          | 707/ 344                                            | 0.487 (4.31)                                          | 3542/ 619                                           | 0.175 (1.55)                                          | 1062/ 436                                           | 0.411 (3.64)                                          |
| <b>60</b>      | <b>I</b>     | 4401/ 680                                           | 0.155 (1.37)                                          | 663/ 275                                            | 0.415 (3.67)                                          | 3783/ 549                                           | 0.145 (1.28)                                          | 1281/ 406                                           | 0.317 (2.81)                                          |
| <b>70</b>      | <b>I</b>     | 2351/ 314                                           | 0.134 (1.19)                                          | 282/ 78                                             | 0.277 (2.45)                                          | 2024/ 261                                           | 0.129 (1.14)                                          | 609/ 131                                            | 0.215 (1.90)                                          |
| <b>80</b>      | <b>I</b>     | 1533/ 166                                           | 0.108 (0.96)                                          | 190/ 41                                             | 0.216 (1.91)                                          | 1323/ 130                                           | 0.098 (0.87)                                          | 400/ 77                                             | 0.193 (1.71)                                          |
| <b>40</b>      | <b>II</b>    | 2370/ 753                                           | 0.318 (2.81)                                          | 1019/ 619                                           | 0.607 (5.37)                                          | 2187/ 654                                           | 0.299 (2.65)                                          | 1202/ 718                                           | 0.597 (5.28)                                          |
| <b>50</b>      | <b>II</b>    | 3173/ 765                                           | 0.241 (2.13)                                          | 948/ 629                                            | 0.664 (5.88)                                          | 2841/ 653                                           | 0.230 (2.04)                                          | 1280/ 741                                           | 0.579 (5.12)                                          |
| <b>60</b>      | <b>II</b>    | 2873/ 599                                           | 0.208 (1.84)                                          | 719/ 381                                            | 0.530 (4.69)                                          | 2421/ 482                                           | 0.199 (1.76)                                          | 1171/ 498                                           | 0.425 (3.76)                                          |
| <b>70</b>      | <b>II</b>    | 1290/ 228                                           | 0.177 (1.57)                                          | 261/ 86                                             | 0.330 (2.92)                                          | 1071/ 186                                           | 0.174 (1.54)                                          | 480/ 128                                            | 0.267 (2.36)                                          |
| <b>80</b>      | <b>II</b>    | 916/ 156                                            | 0.170 (1.50)                                          | 166/ 54                                             | 0.325 (2.88)                                          | 770/ 136                                            | 0.177 (1.57)                                          | 312/ 74                                             | 0.237 (2.10)                                          |
| <b>40</b>      | <b>III</b>   | 979/ 361                                            | 0.369 (3.27)                                          | 431/ 309                                            | 0.717 (6.35)                                          | 893/ 314                                            | 0.352 (3.12)                                          | 517/ 356                                            | 0.689 (6.10)                                          |
| <b>50</b>      | <b>III</b>   | 1255/ 380                                           | 0.303 (2.68)                                          | 462/ 303                                            | 0.656 (5.81)                                          | 1086/ 299                                           | 0.275 (2.43)                                          | 631/ 384                                            | 0.609 (5.39)                                          |
| <b>60</b>      | <b>III</b>   | 914/ 270                                            | 0.295 (2.61)                                          | 340/ 212                                            | 0.624 (5.52)                                          | 720/ 216                                            | 0.300 (2.65)                                          | 534/ 266                                            | 0.498 (4.41)                                          |
| <b>70</b>      | <b>III</b>   | 384/ 107                                            | 0.279 (2.47)                                          | 128/ 48                                             | 0.375 (3.32)                                          | 312/ 86                                             | 0.276 (2.44)                                          | 200/ 69                                             | 0.345 (3.05)                                          |
| <b>80</b>      | <b>III</b>   | 308/ 51                                             | 0.166 (1.47)                                          | 72/ 28                                              | 0.389 (3.44)                                          | 241/ 42                                             | 0.174 (1.54)                                          | 139/ 37                                             | 0.266 (2.35)                                          |
| <b>Married</b> |              |                                                     |                                                       |                                                     |                                                       |                                                     |                                                       |                                                     |                                                       |
| <b>40</b>      | <b>I</b>     | 10025/ 650                                          | 0.065 (0.58)                                          | 2941/ 328                                           | 0.112 (0.99)                                          | 9437/ 580                                           | 0.061 (0.54)                                          | 3529/ 398                                           | 0.113 (1.00)                                          |
| <b>50</b>      | <b>I</b>     | 20802/1050                                          | 0.050 (0.44)                                          | 4449/ 538                                           | 0.121 (1.07)                                          | 18927/ 922                                          | 0.049 (0.43)                                          | 6324/ 666                                           | 0.105 (0.93)                                          |
| <b>60</b>      | <b>I</b>     | 29265/1338                                          | 0.046 (0.41)                                          | 5328/ 583                                           | 0.109 (0.96)                                          | 25294/1117                                          | 0.044 (0.39)                                          | 9299/ 804                                           | 0.086 (0.76)                                          |
| <b>70</b>      | <b>I</b>     | 19174/ 689                                          | 0.036 (0.32)                                          | 2803/ 247                                           | 0.088 (0.78)                                          | 16621/ 579                                          | 0.035 (0.31)                                          | 5356/ 357                                           | 0.067 (0.59)                                          |
| <b>80</b>      | <b>I</b>     | 10588/ 303                                          | 0.029 (0.26)                                          | 1299/ 92                                            | 0.071 (0.63)                                          | 9082/ 254                                           | 0.028 (0.25)                                          | 2805/ 141                                           | 0.050 (0.44)                                          |
| <b>40</b>      | <b>II</b>    | 9705/ 887                                           | 0.091 (0.81)                                          | 4265/ 696                                           | 0.163 (1.44)                                          | 8913/ 798                                           | 0.090 (0.80)                                          | 5057/ 785                                           | 0.155 (1.37)                                          |
| <b>50</b>      | <b>II</b>    | 14726/1039                                          | 0.071 (0.63)                                          | 5227/ 869                                           | 0.166 (1.47)                                          | 13167/ 883                                          | 0.067 (0.59)                                          | 6786/1025                                           | 0.151 (1.34)                                          |
| <b>60</b>      | <b>II</b>    | 16004/ 999                                          | 0.062 (0.55)                                          | 4840/ 668                                           | 0.138 (1.22)                                          | 13602/ 821                                          | 0.060 (0.53)                                          | 7242/ 846                                           | 0.117 (1.04)                                          |
| <b>70</b>      | <b>II</b>    | 8752/ 459                                           | 0.052 (0.46)                                          | 2115/ 235                                           | 0.111 (0.98)                                          | 7446/ 387                                           | 0.052 (0.46)                                          | 3421/ 307                                           | 0.090 (0.80)                                          |
| <b>80</b>      | <b>II</b>    | 5004/ 224                                           | 0.045 (0.40)                                          | 1025/ 94                                            | 0.092 (0.81)                                          | 4196/ 195                                           | 0.046 (0.41)                                          | 1833/ 123                                           | 0.067 (0.59)                                          |
| <b>40</b>      | <b>III</b>   | 3842/ 387                                           | 0.101 (0.89)                                          | 1752/ 324                                           | 0.185 (1.64)                                          | 3458/ 332                                           | 0.096 (0.85)                                          | 2136/ 379                                           | 0.177 (1.57)                                          |
| <b>50</b>      | <b>III</b>   | 4921/ 436                                           | 0.089 (0.79)                                          | 2114/ 340                                           | 0.161 (1.42)                                          | 4264/ 366                                           | 0.086 (0.76)                                          | 2771/ 410                                           | 0.148 (1.31)                                          |
| <b>60</b>      | <b>III</b>   | 5000/ 374                                           | 0.075 (0.66)                                          | 1921/ 277                                           | 0.144 (1.27)                                          | 4107/ 295                                           | 0.072 (0.64)                                          | 2814/ 356                                           | 0.127 (1.12)                                          |
| <b>70</b>      | <b>III</b>   | 2443/ 147                                           | 0.060 (0.53)                                          | 803/ 95                                             | 0.118 (1.04)                                          | 2063/ 122                                           | 0.059 (0.52)                                          | 1183/ 120                                           | 0.101 (0.89)                                          |
| <b>80</b>      | <b>III</b>   | 1402/ 84                                            | 0.060 (0.53)                                          | 402/ 46                                             | 0.114 (1.01)                                          | 1153/ 60                                            | 0.052 (0.46)                                          | 651/ 70                                             | 0.108 (0.96)                                          |

Table S9b. Number of patients in cells stratified by four variables: **age**, (10 yr. increments), **stage**, **marital status (divorced or widowed)** and **ER status**, or **age, stage, marital status (divorced or widowed)** and **PR status**.

| <b>Age</b>      | <b>Stage</b> | Number of patients<br>(Caucasian /African American) | Frequency of African Americans compared to Caucasians | Number of patients<br>(Caucasian /African American) | Frequency of African Americans compared to Caucasians | Number of patients<br>(Caucasian /African American) | Frequency of African Americans compared to Caucasians | Number of patients<br>(Caucasian /African American) | Frequency of African Americans compared to Caucasians |
|-----------------|--------------|-----------------------------------------------------|-------------------------------------------------------|-----------------------------------------------------|-------------------------------------------------------|-----------------------------------------------------|-------------------------------------------------------|-----------------------------------------------------|-------------------------------------------------------|
|                 |              | <b>ER+</b>                                          |                                                       | <b>ER-</b>                                          |                                                       | <b>PR+</b>                                          |                                                       | <b>PR-</b>                                          |                                                       |
|                 | All patients |                                                     | 0.089 (0.79)                                          |                                                     | 0.206 (1.82)                                          |                                                     | 0.086 (0.76)                                          |                                                     | 0.174 (1.54)                                          |
| <b>Divorced</b> |              |                                                     |                                                       |                                                     |                                                       |                                                     |                                                       |                                                     |                                                       |
| <b>40</b>       | <b>I</b>     | 1372/ 155                                           | 0.113 (1.00)                                          | 381/ 76                                             | 0.199 (1.76)                                          | 1312/ 144                                           | 0.110 (0.97)                                          | 441/ 87                                             | 0.197 (1.74)                                          |
| <b>50</b>       | <b>I</b>     | 3349/ 384                                           | 0.115 (1.02)                                          | 707/ 206                                            | 0.291 (2.58)                                          | 3008/ 352                                           | 0.117 (1.04)                                          | 1048/ 238                                           | 0.227 (2.01)                                          |
| <b>60</b>       | <b>I</b>     | 5373/ 582                                           | 0.108 (0.96)                                          | 920/ 270                                            | 0.293 (2.59)                                          | 4620/ 475                                           | 0.103 (0.91)                                          | 1673/ 377                                           | 0.225 (1.99)                                          |
| <b>70</b>       | <b>I</b>     | 3162/ 302                                           | 0.096 (0.85)                                          | 435/ 94                                             | 0.216 (1.91)                                          | 2746/ 255                                           | 0.093 (0.82)                                          | 851/ 141                                            | 0.166 (1.47)                                          |
| <b>80</b>       | <b>I</b>     | 1549/ 126                                           | 0.081 (0.72)                                          | 235/ 32                                             | 0.136 (1.20)                                          | 1303/ 108                                           | 0.083 (0.73)                                          | 481/ 50                                             | 0.104 (0.92)                                          |
| <b>40</b>       | <b>II</b>    | 1344/ 177                                           | 0.132 (1.17)                                          | 619/ 203                                            | 0.328 (2.90)                                          | 1273/ 150                                           | 0.118 (1.04)                                          | 690/ 230                                            | 0.333 (2.95)                                          |
| <b>50</b>       | <b>II</b>    | 2580/ 427                                           | 0.166 (1.47)                                          | 984/ 352                                            | 0.358 (3.17)                                          | 2290/ 369                                           | 0.161 (1.42)                                          | 1274/ 410                                           | 0.322 (2.85)                                          |
| <b>60</b>       | <b>II</b>    | 3258/ 465                                           | 0.143 (1.27)                                          | 1030/ 315                                           | 0.306 (2.71)                                          | 2735/ 377                                           | 0.138 (1.22)                                          | 1553/ 403                                           | 0.259 (2.29)                                          |
| <b>70</b>       | <b>II</b>    | 1600/ 237                                           | 0.148 (1.31)                                          | 438/ 122                                            | 0.279 (2.47)                                          | 1345/ 186                                           | 0.138 (1.22)                                          | 693/ 173                                            | 0.250 (2.21)                                          |
| <b>80</b>       | <b>II</b>    | 883/ 106                                            | 0.120 (1.06)                                          | 186/ 38                                             | 0.204 (1.81)                                          | 737/ 89                                             | 0.121 (1.07)                                          | 332/ 55                                             | 0.166 (1.47)                                          |
| <b>40</b>       | <b>III</b>   | 537/ 104                                            | 0.194 (1.72)                                          | 276/ 81                                             | 0.293 (2.59)                                          | 501/ 91                                             | 0.182 (1.61)                                          | 312/ 94                                             | 0.301 (2.66)                                          |
| <b>50</b>       | <b>III</b>   | 959/ 163                                            | 0.170 (1.50)                                          | 446/ 160                                            | 0.359 (3.18)                                          | 817/ 131                                            | 0.160 (1.42)                                          | 588/ 192                                            | 0.327 (2.89)                                          |
| <b>60</b>       | <b>III</b>   | 1117/ 204                                           | 0.183 (1.62)                                          | 476/ 141                                            | 0.296 (2.62)                                          | 896/ 152                                            | 0.170 (1.50)                                          | 697/ 193                                            | 0.277 (2.45)                                          |
| <b>70</b>       | <b>III</b>   | 511/ 90                                             | 0.176 (1.56)                                          | 193/ 44                                             | 0.228 (2.02)                                          | 426/ 71                                             | 0.167 (1.48)                                          | 278/ 63                                             | 0.227 (2.01)                                          |
| <b>80</b>       | <b>III</b>   | 254/ 47                                             | 0.185 (1.64)                                          | 83/ 24                                              | 0.289 (2.56)                                          | 207/ 35                                             | 0.169 (1.50)                                          | 130/ 36                                             | 0.277 (2.45)                                          |
| <b>Widowed</b>  |              |                                                     |                                                       |                                                     |                                                       |                                                     |                                                       |                                                     |                                                       |
| <b>40</b>       | <b>I</b>     | 113/ 22                                             | 0.195 (1.73)                                          | 26/ 8                                               | 0.308 (2.73)                                          | 108/ 17                                             | 0.157 (1.39)                                          | 31/ 13                                              | 0.419 (3.71)                                          |
| <b>50</b>       | <b>I</b>     | 663/ 99                                             | 0.149 (1.32)                                          | 161/ 32                                             | 0.199 (1.76)                                          | 600/ 77                                             | 0.128 (1.13)                                          | 224/ 54                                             | 0.241 (2.13)                                          |
| <b>60</b>       | <b>I</b>     | 3189/ 380                                           | 0.119 (1.05)                                          | 632/ 136                                            | 0.215 (1.90)                                          | 2788/ 316                                           | 0.113 (1.00)                                          | 1033/ 200                                           | 0.194 (1.72)                                          |
| <b>70</b>       | <b>I</b>     | 7334/ 634                                           | 0.086 (0.76)                                          | 1036/ 204                                           | 0.197 (1.74)                                          | 6312/ 529                                           | 0.084 (0.74)                                          | 2058/ 309                                           | 0.150 (1.33)                                          |
| <b>80</b>       | <b>I</b>     | 11562/ 680                                          | 0.059 (0.52)                                          | 1403/ 160                                           | 0.114 (1.01)                                          | 9867/ 559                                           | 0.057 (0.50)                                          | 3098/ 281                                           | 0.091 (0.81)                                          |
| <b>40</b>       | <b>II</b>    | 136/ 21                                             | 0.154 (1.36)                                          | 54/ 20                                              | 0.370 (3.27)                                          | 123/ 19                                             | 0.154 (1.36)                                          | 67/ 22                                              | 0.328 (2.90)                                          |
| <b>50</b>       | <b>II</b>    | 486/ 90                                             | 0.185 (1.64)                                          | 209/ 70                                             | 0.335 (2.96)                                          | 419/ 81                                             | 0.193 (1.71)                                          | 276/ 79                                             | 0.286 (2.53)                                          |
| <b>60</b>       | <b>II</b>    | 1999/ 307                                           | 0.154 (1.36)                                          | 630/ 212                                            | 0.337 (2.98)                                          | 1679/ 244                                           | 0.145 (1.28)                                          | 950/ 275                                            | 0.289 (2.56)                                          |
| <b>70</b>       | <b>II</b>    | 3753/ 462                                           | 0.123 (1.09)                                          | 904/ 208                                            | 0.230 (2.04)                                          | 3212/ 388                                           | 0.121 (1.07)                                          | 1445/ 282                                           | 0.195 (1.73)                                          |
| <b>80</b>       | <b>II</b>    | 6372/ 558                                           | 0.088 (0.78)                                          | 1360/ 218                                           | 0.160 (1.42)                                          | 5356/ 452                                           | 0.084 (0.74)                                          | 2376/ 324                                           | 0.136 (1.20)                                          |
| <b>40</b>       | <b>III</b>   | 60/ 15                                              | 0.250 (2.21)                                          | 23/ 22                                              | 0.957 (8.47)                                          | 54/ 11                                              | 0.204 (1.81)                                          | 29/ 26                                              | 0.900 (7.96)                                          |
| <b>50</b>       | <b>III</b>   | 205/ 46                                             | 0.224 (1.98)                                          | 101/ 44                                             | 0.436 (3.86)                                          | 173/ 38                                             | 0.220 (1.95)                                          | 133/ 52                                             | 0.391 (3.46)                                          |
| <b>60</b>       | <b>III</b>   | 739/ 142                                            | 0.192 (1.70)                                          | 289/ 89                                             | 0.308 (2.73)                                          | 593/ 107                                            | 0.180 (1.59)                                          | 435/ 124                                            | 0.285 (2.52)                                          |
| <b>70</b>       | <b>III</b>   | 1168/ 196                                           | 0.168 (1.49)                                          | 413/ 98                                             | 0.237 (2.10)                                          | 981/ 155                                            | 0.158 (1.40)                                          | 600/ 139                                            | 0.232 (2.05)                                          |
| <b>80</b>       | <b>III</b>   | 2006/ 204                                           | 0.102 (0.90)                                          | 663/ 117                                            | 0.176 (1.56)                                          | 1649/ 144                                           | 0.087 (0.77)                                          | 1020/ 177                                           | 0.174 (1.54)                                          |
